# Supplementary material for: The relationship between phosphorus retention and fibroblast growth factor 23 in broiler breeders
Source: PubMed Central journal article supplement — Poult Sci. 2024 May 23;103(8):103889. doi: 10.1016/j.psj.2024.103889 (PMC11209637; doi:10.1016/j.psj.2024.103889), 2024-05-23
Supplement: mmc1.pdf [file mmc1.pdf]

## Certificate of Analysis

Product name: Chicken Fibroblast growth factor 23 Elisa kit  
 Catalogue No.: CKF0016  
 Expiration data: 6 months  
 Storage all reagents: 2-8° C

**PRECISION**

In the same lot: CV%: 4.9, 6.2  
 Different lot: CV%: 8.2, 9.5

**RECOVERY**

| Sample type | average% recovery | range  |
|-------------|-------------------|--------|
| Serum       | 90                | 85-95% |

**LINEARITY**

|       |                       | Serum  |
|-------|-----------------------|--------|
| 1: 2  | Average % of Expected | 90     |
|       | Range (%)             | 85- 95 |
| 1: 4  | Average % of Expected | 93     |
|       | Range (%)             | 88-98  |
| 1: 8  | Average % of Expected | 90     |
|       | Range (%)             | 89- 92 |
| 1: 16 | Average % of Expected | 90     |
|       | Range (%)             | 88- 94 |

**STANDARD CURVE** for demonstration only:

| Standards | OD    |
|-----------|-------|
| 0         | 1.41  |
| 100       | 1.198 |
| 250       | 0.892 |
| 500       | 0.623 |
| 1000      | 0.387 |
| 2500      | 0.095 |

Approved by: Mammi G  
 QC manager

Date: May 9, 2023
